# Supplementary material
Source: PubMed Central journal article supplement (PMC11029332)

**Supplementary Table 1. Characteristics of newly diagnosed multiple myeloma patients**

| Characteristics                                                  | NDMM patients<br>(N = 25) (%) |
|------------------------------------------------------------------|-------------------------------|
| Age, years; median (range)                                       | 64 (46-80)                    |
| Sex (M/F)                                                        | 15 (60)/10 (40)               |
| Serum M-protein                                                  |                               |
| IgG                                                              | 12 (48)                       |
| IgA                                                              | 6 (24)                        |
| Light chain, kappa                                               | 4 (16)                        |
| Light chain, lambda                                              | 2 (8)                         |
| Others                                                           | 1 (4)                         |
| Durie-Salmon stage                                               |                               |
| IIIa/ IIIb                                                       | 17 (68)/8 (32)                |
| ISS stage                                                        |                               |
| I/II/III                                                         | 5 (20)/12 (48)/8 (32)         |
| Cytogenetics*                                                    |                               |
| Standard risk/ High risk/NA                                      | 17 (68)/7 (28)/1 (4)          |
| Myeloma bone disease on plain radiographs yes/no                 | 19 (76)/6 (24)                |
| Serum M-protein at diagnosis <sup>†</sup> , g/dL, median (range) | 4.12 (1.62-5.54)              |
| Cr at diagnosis, mg/dL, median (range)                           | 1.2 (1.0-5.0)                 |
| β2-microglobulin at diagnosis, mg/mL, median (range)             | 3.9 (1.9-12.6)                |
| Hb at diagnosis, g/dL, median (range)                            | 10.0 (5.7-14.3)               |
| Ca at diagnosis, mg/dL, median (range)                           | 9.0 (7.7-14.7)                |
| LDH at diagnosis, U/L, median (range)                            | 429 (148-790)                 |

Ca, calcium; Cr, creatinine; F, female; Hb, hemoglobin; LDH, lactate dehydrogenase; M, male; NA, non-available; NDMM, newly diagnosed multiple myeloma

\* High-risk cytogenetics is defined as hypodiploidy or deletion of chr13 on conventional cytogenetics or presence of t(4;14), t(14;16), -17p on fluorescent *in situ* hybridization and/or conventional cytogenetics. All other cytogenetic abnormalities were considered standard risk.

<sup>†</sup> Patients with measurable serum M protein of at least 1 g per 100mL were included.

**Supplementary Table 2. Immune cell populations in NDMM and RRMM**

| Parameters                                                       | Healthy volunteers<br>(n = 38) | Multiple myeloma patients |                                        |
|------------------------------------------------------------------|--------------------------------|---------------------------|----------------------------------------|
|                                                                  |                                | NDMM<br>(n = 25)          | RRMM<br>(Prior to Len-dex)<br>(n = 90) |
| Frequency of cell population (%), mean $\pm$ SE                  |                                |                           |                                        |
| CD3 <sup>+</sup>                                                 | 63.75 $\pm$ 1.79               | 55.76 $\pm$ 4.00          | 51.65 $\pm$ 1.79                       |
| CD4 <sup>+</sup>                                                 | 40.08 $\pm$ 1.61               | 36.39 $\pm$ 3.28          | 22.49 $\pm$ 1.29                       |
| CD8 <sup>+</sup>                                                 | 21.68 $\pm$ 1.35               | 17.35 $\pm$ 1.91          | 28.16 $\pm$ 1.35                       |
| NK cell<br>(CD16 <sup>+</sup> CD56 <sup>+</sup> )                | 10.90 $\pm$ 1.00               | 12.15 $\pm$ 1.88          | 11.07 $\pm$ 0.76                       |
| NKT-like cell<br>(CD3 <sup>+</sup> CD56 <sup>+</sup> )           | 4.72 $\pm$ 0.80                | 3.32 $\pm$ 0.85           | 2.30 $\pm$ 0.22                        |
| G-MDSC                                                           | 0.09 $\pm$ 0.02                | 0.09 $\pm$ 0.02           | 0.11 $\pm$ 0.01                        |
| M-MDSC                                                           | 0.27 $\pm$ 0.04                | 2.19 $\pm$ 0.54           | 0.35 $\pm$ 0.04                        |
| Absolute count of cell population, cells/ $\mu$ L, mean $\pm$ SE |                                |                           |                                        |
| CD3 <sup>+</sup>                                                 | -                              | 1206.65 $\pm$ 115.81      | 1042.66 $\pm$ 61.14                    |
| CD4 <sup>+</sup>                                                 | -                              | 785.57 $\pm$ 92.06        | 447.52 $\pm$ 33.57                     |
| CD8 <sup>+</sup>                                                 | -                              | 378.20 $\pm$ 48.45        | 575.80 $\pm$ 40.50                     |
| NK cell<br>(CD16 <sup>+</sup> CD56 <sup>+</sup> )                | -                              | 240.50 $\pm$ 35.21        | 214.3 $\pm$ 17.03                      |
| NKT-like cell<br>(CD3 <sup>+</sup> CD56 <sup>+</sup> )           | -                              | 69.37 $\pm$ 19.11         | 46.51 $\pm$ 5.38                       |
| G-MDSC                                                           | -                              | 1.80 $\pm$ 0.48           | 2.05 $\pm$ 0.20                        |
| M-MDSC                                                           | -                              | 46.78 $\pm$ 13.51         | 6.46 $\pm$ 0.78                        |

G, granulocytic; Len-dex, lenalidomide and low-dose dexamethasone; M, monocytic; MDSC, myeloid-derived suppressor cell; NDMM, newly diagnosed multiple myeloma; NK, natural killer; RRMM, refractory/relapsed multiple myeloma; SE, standard error

**Supplementary Table 3. Univariate analyses of predictive factors for response, TTNT, and TTP**

| Univariate variables                                               | Response ( $\geq$ VGPR)  |       | TTNT                     |       | TTP                      |       |
|--------------------------------------------------------------------|--------------------------|-------|--------------------------|-------|--------------------------|-------|
|                                                                    | Hazard ratio<br>(95% CI) | P     | Hazard ratio<br>(95% CI) | P     | Hazard ratio<br>(95% CI) | P     |
| <b>Frequency of cell population (%), baseline</b>                  |                          |       |                          |       |                          |       |
| CD3 <sup>+</sup>                                                   | 0.99 (0.96-1.01)         | 0.352 | 1.01 (0.99-1.04)         | 0.298 | 1.00 (0.98-1.02)         | 0.830 |
| CD4 <sup>+</sup>                                                   | 1.01 (0.97-1.05)         | 0.610 | 1.00 (0.97-1.03)         | 0.970 | 1.00 (0.98-1.03)         | 0.771 |
| CD8 <sup>+</sup>                                                   | 0.97 (0.94-1.01)         | 0.117 | 1.02 (0.99-1.05)         | 0.176 | 1.00 (0.98-1.03)         | 0.875 |
| NK cell (CD16 <sup>+</sup> CD56 <sup>+</sup> )                     | 1.00 (0.94-1.07)         | 0.941 | 1.01 (0.96-1.06)         | 0.773 | 1.00 (0.96-1.04)         | 0.963 |
| NKT-like cell (CD3 <sup>+</sup> CD56 <sup>+</sup> )                | 0.90 (0.72-1.13)         | 0.365 | 0.96 (0.79-1.16)         | 0.640 | 0.84 (0.70-1.02)         | 0.072 |
| G-MDSC                                                             | 0.33 (0.01-26.44)        | 0.622 | 11.19 (0.70-177.8)       | 0.087 | 5.95 (0.31-114.0)        | 0.236 |
| M-MDSC                                                             | 1.94 (0.53-7.08)         | 0.317 | 1.21 (1.53-2.77)         | 0.645 | 1.17 (0.57-2.40)         | 0.663 |
| <b>Frequency of cell population (%), after 3 cycles</b>            |                          |       |                          |       |                          |       |
| CD3 <sup>+</sup>                                                   | 1.01 (0.98-1.05)         | 0.520 | 0.98 (0.96-1.01)         | 0.235 | 0.99 (0.96-1.01)         | 0.163 |
| CD4 <sup>+</sup>                                                   | 1.00 (0.96-1.05)         | 0.861 | 0.99 (0.95-1.03)         | 0.497 | 0.98 (0.95-1.02)         | 0.334 |
| CD8 <sup>+</sup>                                                   | 1.02 (0.96-1.08)         | 0.578 | 0.98 (0.93-1.02)         | 0.317 | 0.98 (0.94-1.02)         | 0.237 |
| NK cell (CD16 <sup>+</sup> CD56 <sup>+</sup> )                     | 0.97 (0.92-1.04)         | 0.399 | 1.03 (0.99-1.07)         | 0.212 | 1.01 (0.97-1.05)         | 0.713 |
| NKT-like cell (CD3 <sup>+</sup> CD56 <sup>+</sup> )                | 1.03 (0.74-1.42)         | 0.873 | 0.95 (0.74-1.23)         | 0.695 | 0.90 (0.71-1.15)         | 0.401 |
| G-MDSC                                                             | 0.13 (0.01-31.45)        | 0.468 | 45.89 (0.54-3931.7)      | 0.092 | 0.04 (0.00-22.59)        | 0.315 |
| M-MDSC                                                             | 0.43 (0.14-1.31)         | 0.138 | 1.03 (0.83-1.28)         | 0.793 | 1.01 (0.83-1.22)         | 0.936 |
| <b>Ratio of cell frequency after 3 cycles relative to baseline</b> |                          |       |                          |       |                          |       |
| CD3 <sup>+</sup>                                                   | 8.89 (1.10-72.11)        | 0.041 | 0.19 (0.04-0.89)         | 0.035 | 0.50 (0.16-1.51)         | 0.217 |
| CD4 <sup>+</sup>                                                   | 4.37 (0.74-25.86)        | 0.104 | 0.31 (0.08-1.30)         | 0.110 | 0.58 (0.22-1.57)         | 0.286 |
| CD8 <sup>+</sup>                                                   | 4.35 (0.82-23.22)        | 0.085 | 0.24 (0.06-1.07)         | 0.061 | 0.46 (0.16-1.30)         | 0.144 |
| NK cell                                                            | 0.73 (0.35-1.52)         | 0.398 | 1.24 (0.86-1.78)         | 0.249 | 1.20 (0.87-1.65)         | 0.272 |
| NKT-like cell                                                      | 2.18 (0.86-5.48)         | 0.099 | 0.86 (0.45-1.64)         | 0.654 | 1.41 (0.84-2.37)         | 0.194 |
| G-MDSC                                                             | 1.08 (0.79-1.46)         | 0.634 | 1.13 (0.91-1.40)         | 0.260 | 1.03 (0.82-1.30)         | 0.782 |
| M-MDSC                                                             | 0.84 (0.68-1.03)         | 0.085 | 1.02 (0.90-1.14)         | 0.796 | 1.02 (0.93-1.12)         | 0.709 |

CI, confidence interval; G, granulocytic; M, monocytic; MDSC, myeloid-derived suppressor cell; NK, natural killer; TTNT, time to next treatment; TTP, time to progression; VGPR, very good partial response.

**Supplementary Table 4. Univariate analyses of clinical predictive factors for response, TTNT, and TTP**

| Univariate variables                     | Response ( $\geq$ VGPR) |       | TTNT                  |       | TTP                   |       |
|------------------------------------------|-------------------------|-------|-----------------------|-------|-----------------------|-------|
|                                          | Hazard ratio (95% CI)   | P     | Hazard ratio (95% CI) | P     | Hazard ratio (95% CI) | P     |
| Age (years), continuous                  | 1.06 (1.00-1.11)        | 0.045 | 1.00 (0.96-1.03)      | 0.867 | 1.01 (0.98-1.05)      | 0.458 |
| Sex (F vs. M)                            | 1.22 (0.51-2.96)        | 0.653 | 1.99 (0.98-4.03)      | 0.057 | 2.39 (1.30-4.41)      | 0.005 |
| Immunoglobulin type (others vs. LCD)     | 0.65 (0.21-1.99)        | 0.445 | 0.70 (0.31-1.55)      | 0.374 | 1.13 (0.53-2.44)      | 0.749 |
| ISS stage (II-III vs. I)                 | 1.58 (0.54-4.63)        | 0.403 | 0.64 (0.30-1.40)      | 0.264 | 0.61 (0.31-1.19)      | 0.147 |
| Cytogenetics (high risk vs. standard)    | 1.08 (0.37-3.16)        | 0.891 | 1.62 (0.76-3.45)      | 0.213 | 1.42 (0.72-2.79)      | 0.313 |
| Lytic bone lesions (no vs. yes)          | 0.65 (0.20-2.13)        | 0.472 | 1.32 (0.57-3.04)      | 0.522 | 0.85 (0.38-1.91)      | 0.695 |
| Hb (g/dL), continuous                    | 1.23 (0.96-1.57)        | 0.098 | 0.85 (0.71-1.03)      | 0.090 | 0.86 (0.72-1.02)      | 0.084 |
| Platelet ( $\times 10^9/L$ ), continuous | 1.01 (1.00-1.01)        | 0.043 | 1.00 (1.00-1.00)      | 0.159 | 1.00 (0.99-1.00)      | 0.184 |
| Ca (mg/dL), continuous                   | 1.87 (0.98-3.57)        | 0.060 | 0.66 (0.37-1.17)      | 0.155 | 0.85 (0.55-1.32)      | 0.467 |
| Cr (mg/dL), continuous                   | 0.91 (0.66-1.26)        | 0.565 | 0.86 (0.63-1.17)      | 0.343 | 0.83 (0.61-1.12)      | 0.226 |
| Albumin (mg/dL), continuous              | 1.61 (0.70-3.68)        | 0.263 | 0.57 (0.31-1.05)      | 0.071 | 0.62 (0.36-1.05)      | 0.075 |
| LDH (U/L), continuous                    | 1.00 (1.00-1.00)        | 0.756 | 1.00 (1.00-1.00)      | 0.495 | 1.00 (1.00-1.00)      | 0.421 |

Ca, calcium; Cr, creatinine; CI, confidence interval; F, female; Hb, hemoglobin; LCD, light chain disease; LDH, lactate dehydrogenase; M, male; TTNT, time to next treatment; TTP, time to progression; VGPR, very good partial response.

Supplementary Figure 1. NKT cells marking CD3+CD56+ (left panel of a and b) vs. Vβ11+CD3+ (right panel of a and b) were shown in two representative patients.

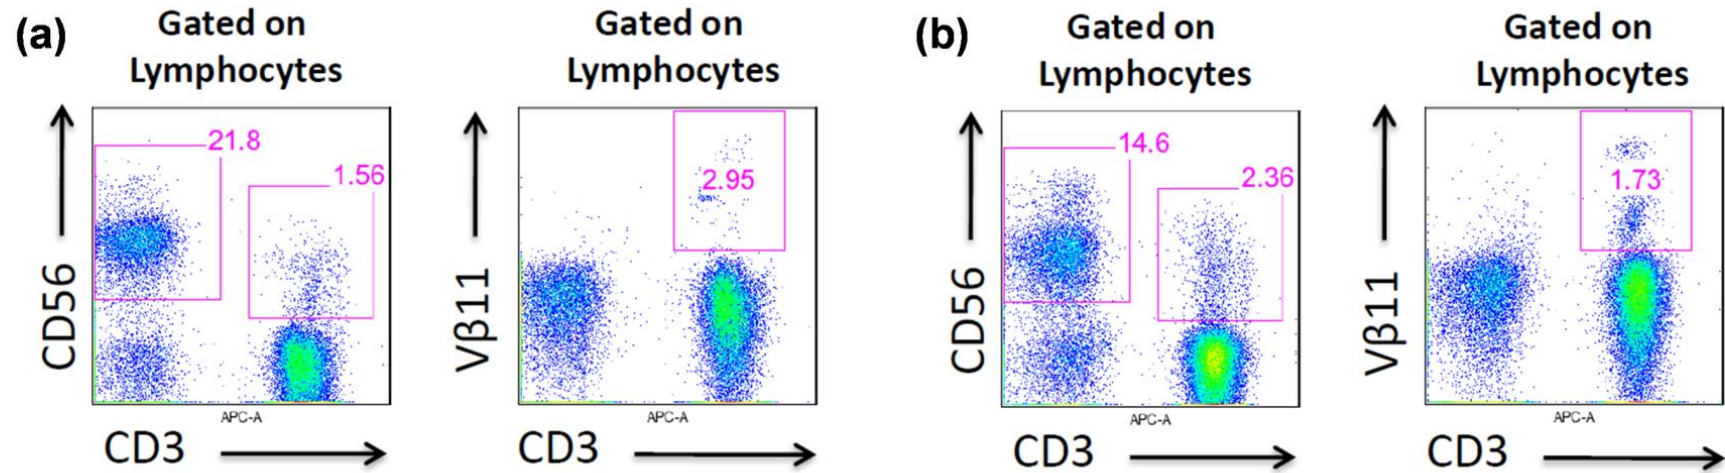

**Supplementary Figure 2. Changes in the level of various cytokines according to the response to Len-dex.** Changes in the level of each cytokine between baseline and after 3 cycles of Len-dex are indicated. There was no significant change in any cytokine after 3 cycles of Len-dex therapy in both the  $\geq$ VGPR group and  $\leq$ PR group. Data are presented as mean  $\pm$  SEM and 2-tailed Student t-tests were used to compare the continuous variables (baseline vs. after 3 cycles of Len-dex). Boxes indicate the first and third quartiles and the median is indicated with an interior line. Whiskers indicate minimum and maximum.

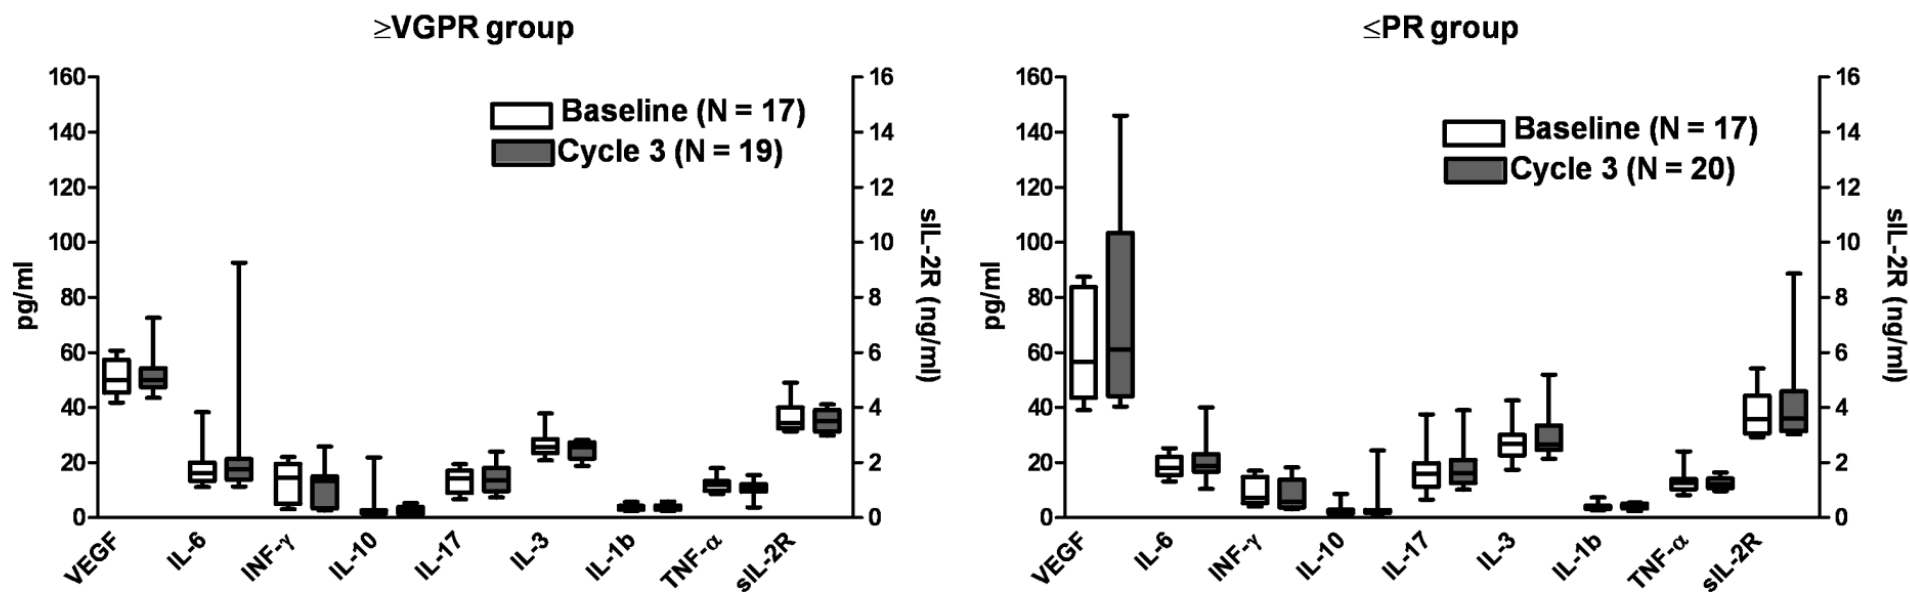

Supplement: 262_2016_1861_MOESM1_ESM.pdf [file 262_2016_1861_MOESM1_ESM.pdf]
